# Supplementary material for: CO2-Induced Fibrous Zn Catalyst Promotes Electrochemical Reduction of CO2 to CO
Source: MDPI journal article supplement (doi:10.3390/catal11040477), 2021-04-08
Supplement: s1 [file s1]

*Supporting materials*

# CO<sub>2</sub>-Induced Fibrous Zn Catalyst Promotes Electrochemical Reduction of CO<sub>2</sub> to CO

Mengquan Guo <sup>1</sup>, Xiangxiang Li <sup>1</sup>, Yuxin Huang <sup>1</sup>, Linfa Li <sup>1</sup>, Jixiao Li <sup>1</sup>, Yiren Lu <sup>1</sup>, Yanhong Xu <sup>2,\*</sup> and Lihong Zhang <sup>1,\*</sup>

<sup>1</sup> Department of Catalysis Science and Technology and Tianjin Key Laboratory of Applied Catalysis Science & Technology, School of Chemical Engineering and Technology, Tianjin University, Tianjin 300350, China; gmq\_0105@tju.edu.cn (M.G.); lixx\_37@tju.edu.cn (X.L.); youningtdzhy@163.com (Y.H.) lithium@tju.edu.cn (L.L.) tokenobug@163.com (J.L.) luyiren@tju.edu.cn (Y.L.)

<sup>2</sup> Department of Materials Engineering, Xuzhou College of Industrial Technology, Xuzhou 221140, China

\* Correspondence: xuyanh@mail.xzcit.cn (Y.X.); zlh\_224@tju.edu.cn (L.Z.); Tel.: +86-150-6212-8662 (Y.X.); +86-150-2225-5828 (L.Z.)

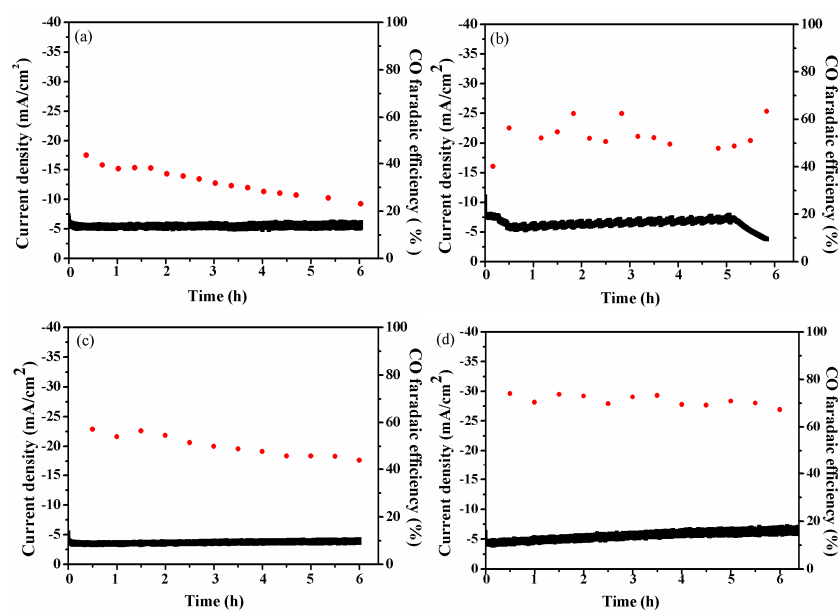

**Figure S1.** Current density and FE<sub>CO</sub> for (a) Zn foil, (b) Zn-N<sub>2</sub>, (c) Zn-H<sub>2</sub> and (d) Zn-CO electrodes during 6 h of long-time operation at -1.2 V vs RHE.

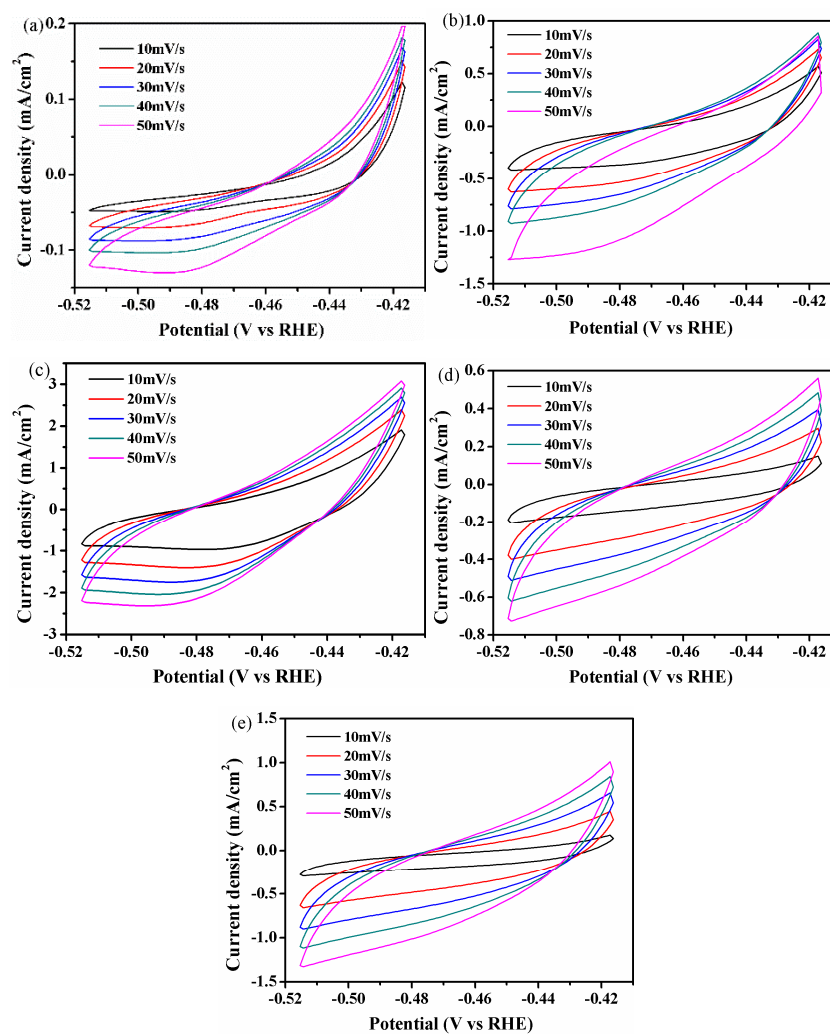

**Figure S2.** CV curves on (a) Zn foil, (b) Zn-N<sub>2</sub>, (c) Zn-CO<sub>2</sub>, (d) Zn-H<sub>2</sub> and (e) Zn-CO electrodes with a potential range from -0.415 to -0.515 V vs RHE in a N<sub>2</sub> bubbled 1 M Na<sub>2</sub>SO<sub>4</sub> electrolyte.

The  $C_{dl}$  was determined by measuring the capacitive current associated with double-layer charging from the scan-rate dependence of cyclic voltammetric stripping. The scan rates were 10, 20, 30, 40 and 50 mV/s

The  $C_{dl}$  was estimated by plotting the  $\Delta j = (j_a - j_c)$  at  $-0.4653$  V (where  $j_c$  and  $j_a$  are the cathodic and anodic current densities, respectively) versus RHE against the scan rate, in which the slope was twice that of  $C_{dl}$ .

**Table S1.** The data of CO partial current density for Zn-CO<sub>2</sub> electrode.

| Potential (V vs RHE) | CO partial current density (mA/cm <sup>2</sup> ) |
|----------------------|--------------------------------------------------|
| -0.7                 | 0.14                                             |
| -0.8                 | 0.52                                             |
| -0.9                 | 1.24                                             |
| -1.0                 | 2.22                                             |
| -1.1                 | 3.96                                             |
| -1.2                 | 6.14                                             |
| -1.3                 | 7.89                                             |

CO partial current density = Current density \* Faradaic efficiency of CO

**Table S2.** The solubility datas of different gas in water <sup>[1]</sup>.

| Temperature (°C) | N <sub>2</sub> (mL) <sup>a</sup> | CO <sub>2</sub> (mL) | H <sub>2</sub> (mL) | CO (mL) |
|------------------|----------------------------------|----------------------|---------------------|---------|
| 0                | 0.02354                          | 1.713                | 0.02148             | 0.03537 |
| 5                | 0.02086                          | 1.424                | 0.02044             | 0.03149 |
| 10               | 0.01861                          | 1.194                | 0.01955             | 0.02816 |
| 15               | 0.01685                          | 1.019                | 0.01883             | 0.02543 |
| 20               | 0.01546                          | 0.878                | 0.01819             | 0.02319 |
| 25               | 0.01434                          | 0.759                | 0.01754             | 0.02142 |
| 30               | 0.01342                          | 0.665                | 0.01699             | 0.01998 |

<sup>a</sup>Volume (mL) of gas dissolved in 1 mL water measured under standard conditions.

## Reference

1. Dean, J. A. *Lange's Handbook of Chemistry*, 13th ed.; Science: Beijing.
